# Supplementary material
Source: PubMed Central journal article supplement (PMC8187079)
Supplement: NIHMS1676917-supplement-4.pdf [file NIHMS1676917-supplement-4.pdf]

**Cancer Cell, Volume 37**

**Supplemental Information**

**SETD5-Coordinated Chromatin Reprogramming**

**Regulates Adaptive Resistance**

**to Targeted Pancreatic Cancer Therapy**

**Zhentian Wang, Simone Hausmann, Ruitu Lyu, Tie-Mei Li, Shane M. Lofgren, Natasha M. Flores, Mary E. Fuentes, Marcello Caporicci, Ze Yang, Matthew Joseph Meiners, Marcus Adrian Cheek, Sarah Ann Howard, Lichao Zhang, Joshua Eric Elias, Michael P. Kim, Anirban Maitra, Huamin Wang, Michael Cory Bassik, Michael-Christopher Keogh, Julien Sage, Or Gozani, and Pawel K. Mazur**

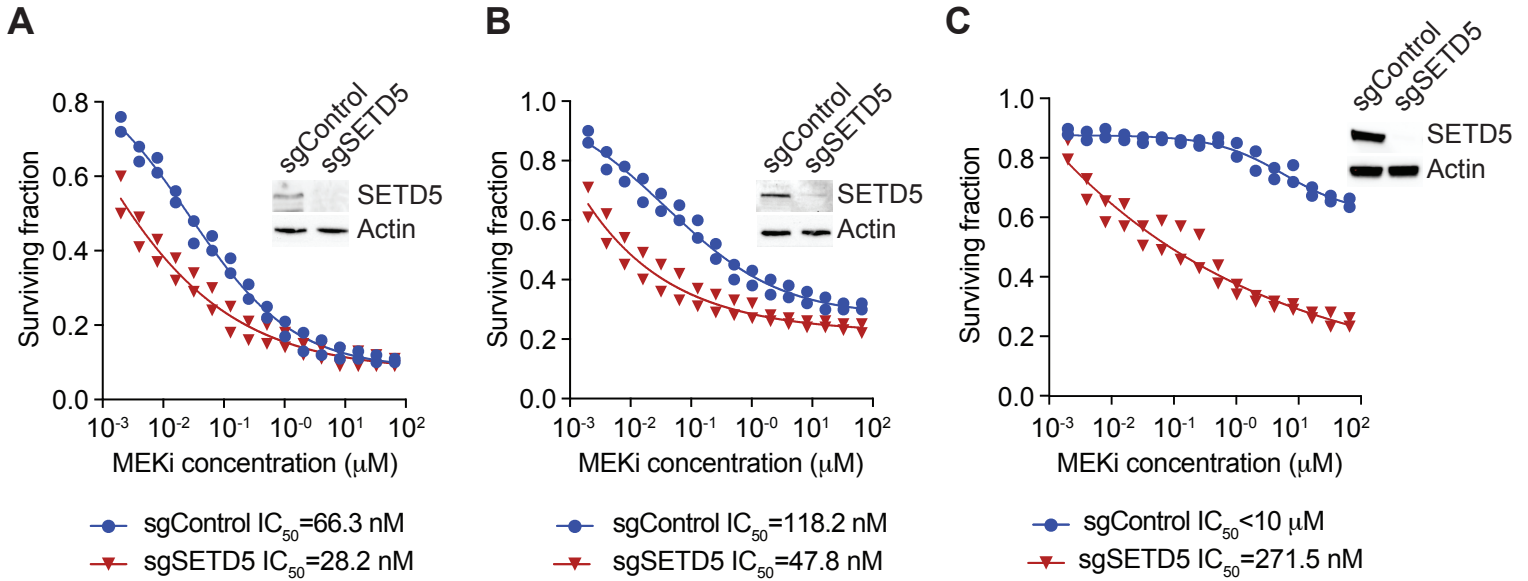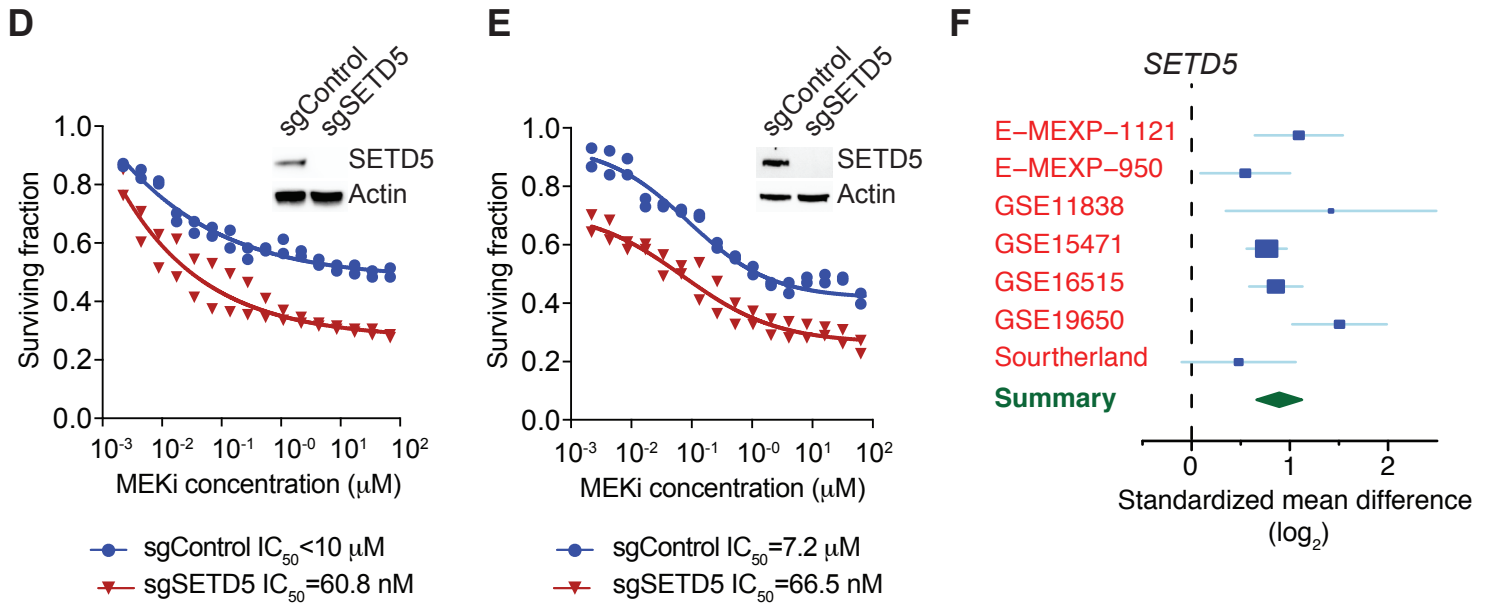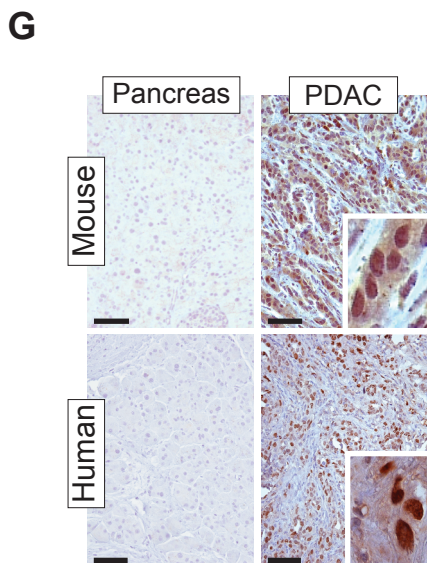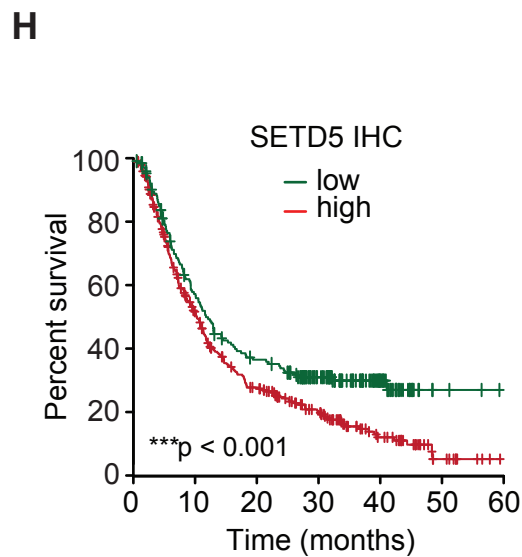

**Supplementary Figure 1. SETD5 expression increases in MEKi resistance and is associated with poor survival outcomes in pancreatic cancer. Related to Figure 1.**

(A-E) SETD5 ablation in human PDAC cell lines CaPan1 (A), PNS1 (B), YAPC (C), DANG (D), KP4 (E) causes the shift in cellular viability in response to MEKi (trametinib) at the dose indicated on the x-axis. Geometric mean half-maximum inhibitory concentration ( $IC_{50}$ ) values for MEKi calculated. Data are represented as mean  $\pm$  SEM of three technical replicates in two independent experiments. Western analysis with the indicated antibodies of cancer cell transduced with Cas9 and sgRNA targeting SETD5 (sgSETD5) and a control non-targeting sgRNA (sgControl). Actin served as loading control.

(F) Summary of *SETD5* expression levels in six publicly available expression data sets of PDAC (n = 294 tumors and n = 141 normal tissue independent samples). Detailed statistical description in [STAR Methods](#).

(G) Representative immunohistochemical (IHC) images showing nuclear SETD5 expression in pancreatic cancer but not in normal pancreas samples from human pancreatic cancer samples (representative of 12 independent samples) and *Kras;p53* mutant mouse model of PDAC (representative of 8 independent samples). Scale bars, 100  $\mu$ m; insets present higher magnification.

(H) Analysis of correlation of SETD5 staining and PDAC patient survival assessed by IHC. \*\*\*p < 0.001, log-rank test, 172 different samples were stained in total.

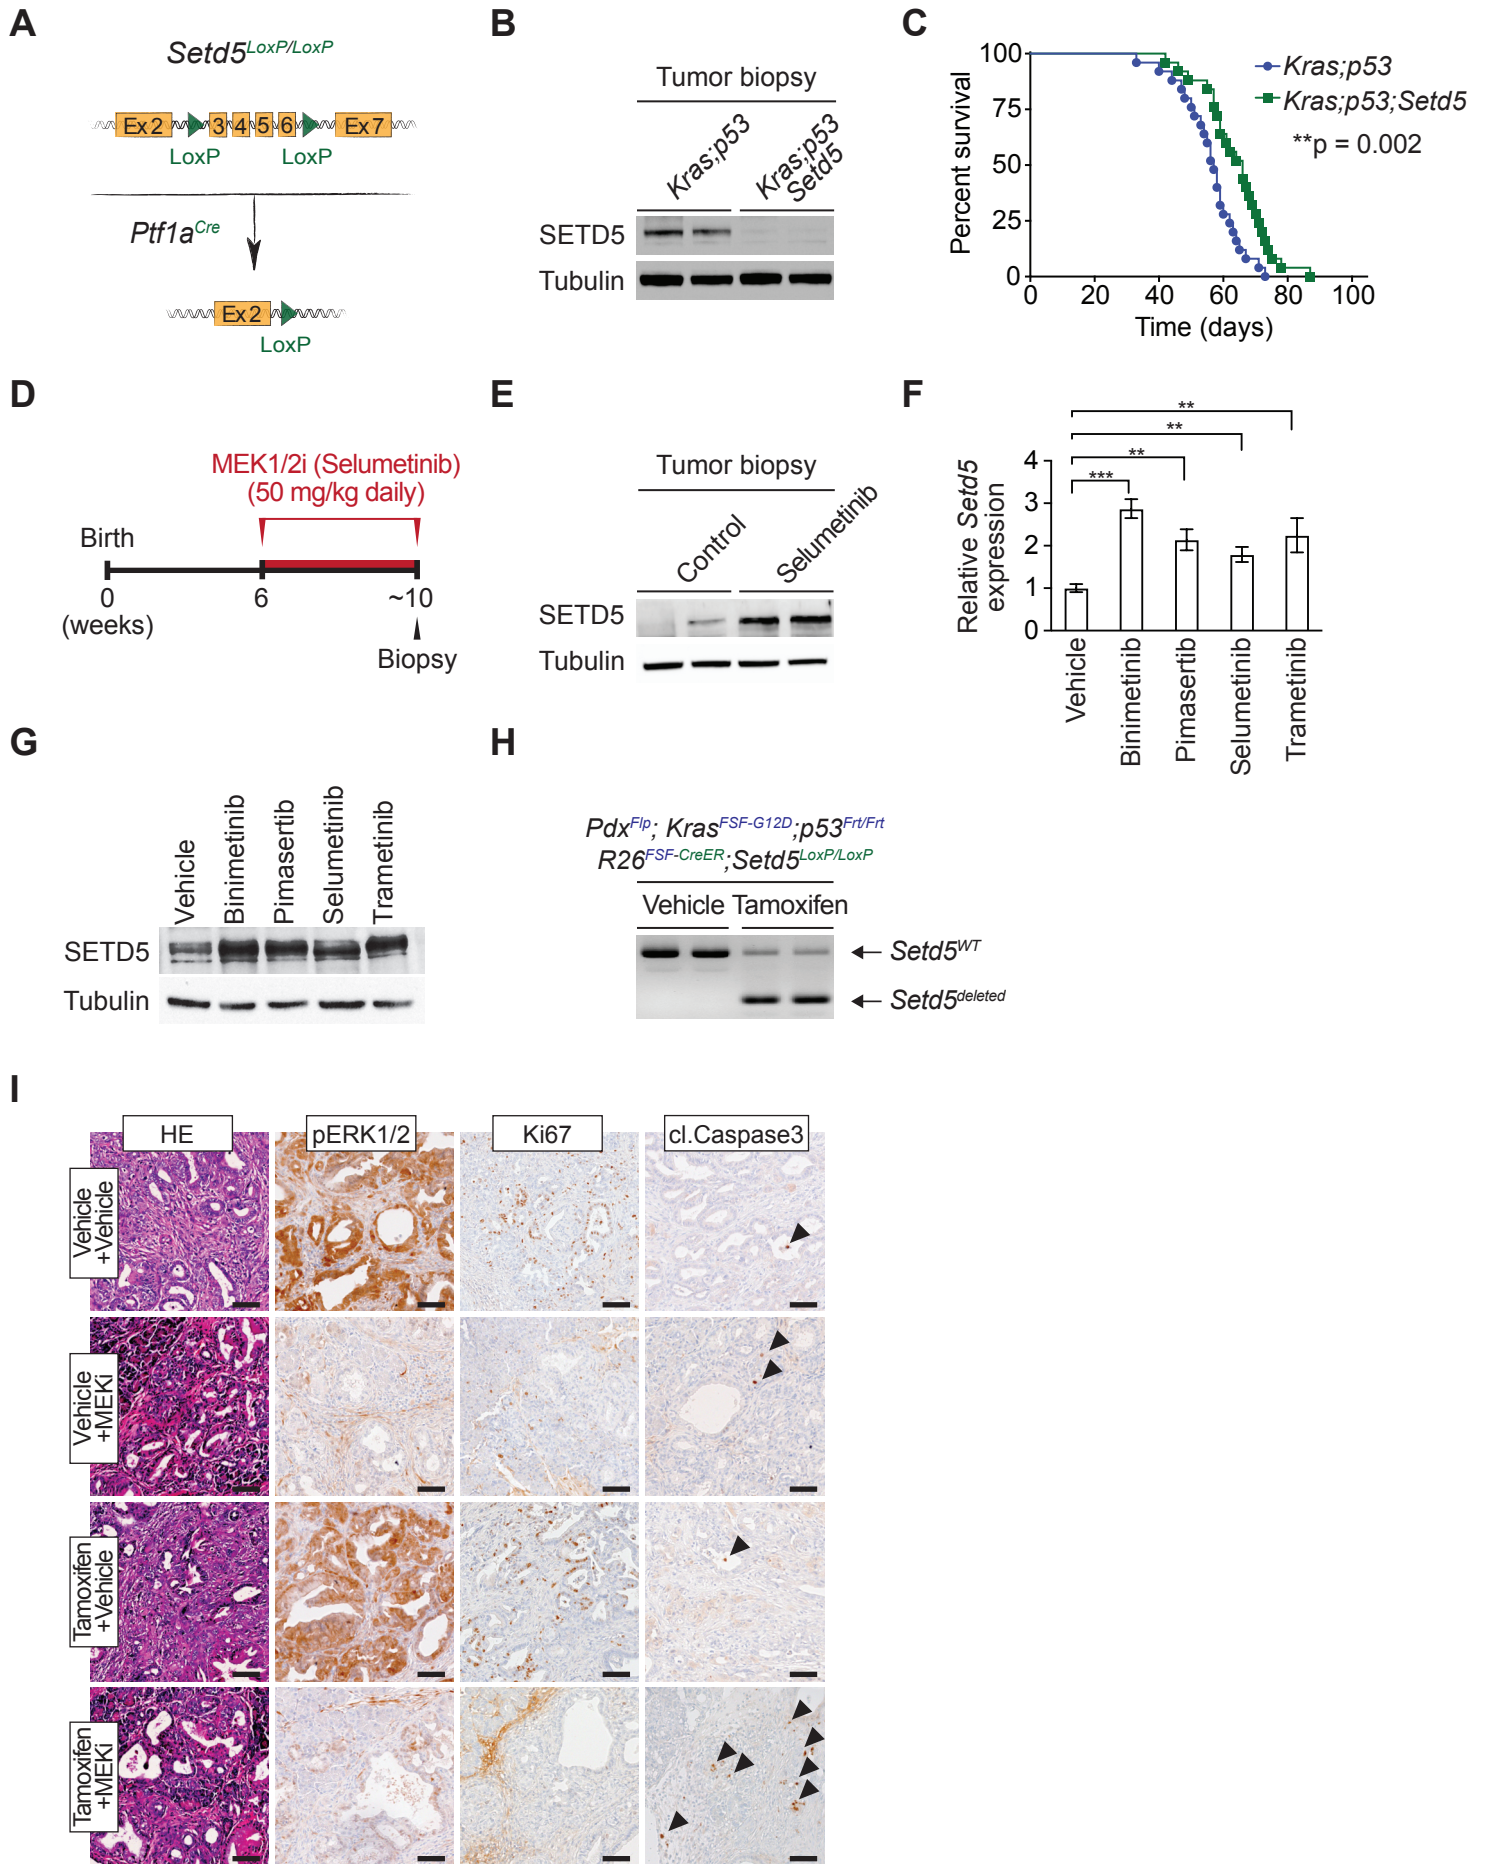

**Supplementary Figure 2. Loss of *Setd5* attenuates *Kras*<sup>G12D</sup>-driven pancreatic tumorigenesis *in vivo* and sensitizes PDAC to MEKi toxicity. Related to Figure 2.**

(A) Schematic of the *Setd5* conditional allele. In the presence of Cre recombinase, exon 3 is deleted to disrupt *Setd5* expression.

(B) Western blots with the indicated antibodies of pancreatic tissue lysates from *Kras;p53;Setd5* and *Kras;p53* (control) mutant mice. Two independent and representative samples are shown for each genotype. Tubulin is shown as a loading control.

(C) Kaplan-Meier survival curves of *Kras;p53;Setd5* (n = 24, median survival = 66 days) and *Kras;p53* (control, n = 27, median survival = 57 days) mice, \*p = 0.002 by log-rank test for significance.

(D) Treatment schedule for administration of Selumetinib (MEK inhibitor) or placebo (vehicle) to *Kras;p53* mutant PDAC mouse model.

(E) Western analysis with the indicated antibodies of tissue biopsy collected from *Kras;p53* mutant mice treated with Selumetinib (E), or placebo (vehicle). Two independent and representative samples are shown.

(F) Quantitative real-time qPCR (qRT-PCR) analysis of *SETD5* expression in control (vehicle) and PDAC cell lines cultured to be resistant to Binimetinib, Pimasertib, Selumetinib and trametinib. Error bars represent mean ± SD from three independent experiments, \*\*p < 0.05, \*\*\* p < 0.001, n.s., not significant, by two-tailed unpaired Student's t test.

(G) Western blot analysis of *SETD5* expression in cells in (F). A representative sample for each condition is shown. Detailed cell treatment condition description in [STAR Methods](#).

(H) Confirmation of successful induction of CreER-mediated recombination of *Setd5*<sup>LoxP/LoxP</sup> allele upon tamoxifen administration by PCR on DNA isolated from tumor biopsy, two independent and representative samples are shown for each treatment group.

(I) Representative HE-stained sections and immunohistochemical staining of pancreas tissue from dual recombinase mouse model of PDAC treated with Tamoxifen, MEKi or placebo (vehicle), (representative of n = 9 mice for each experimental group). Scale bars, 50 µm.

**A**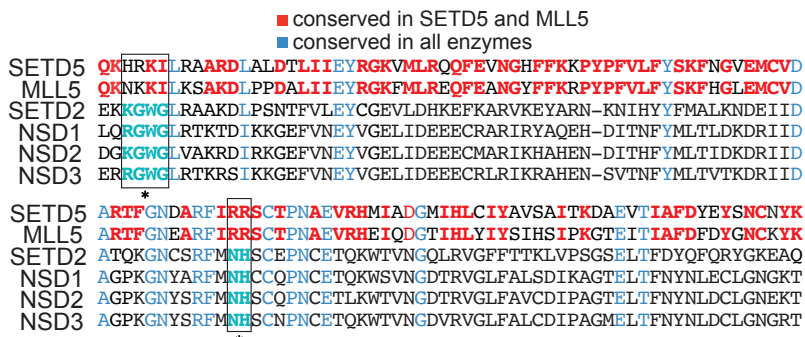**B**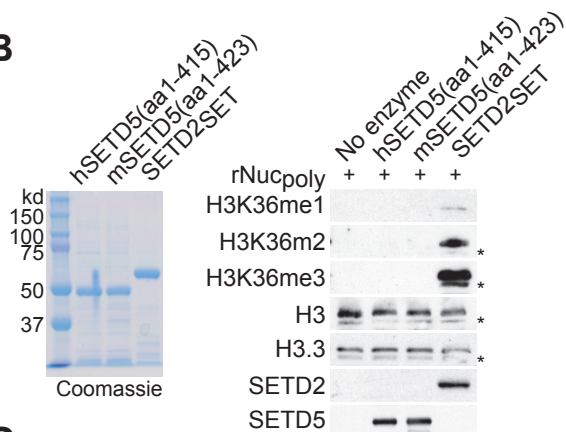**C**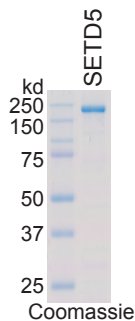**D**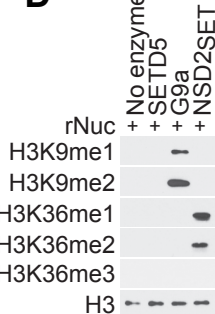**E**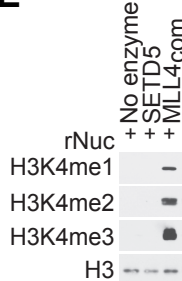**F**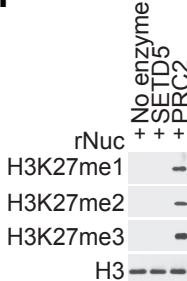**G**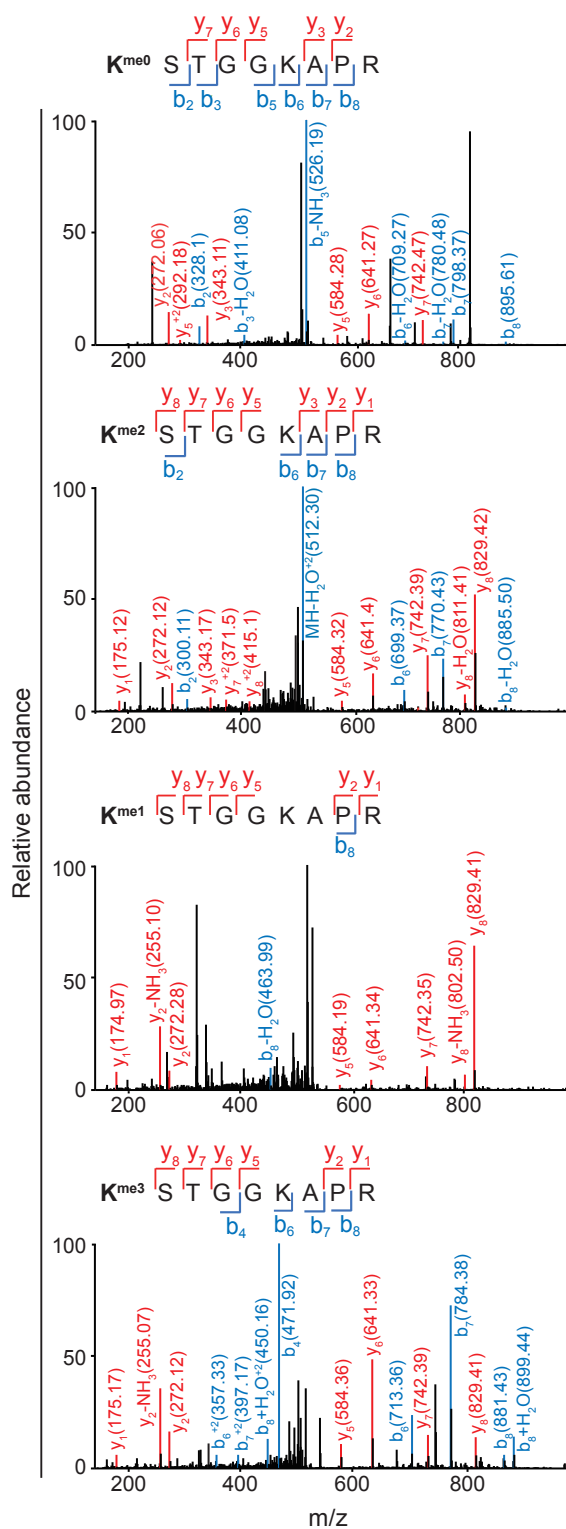**H**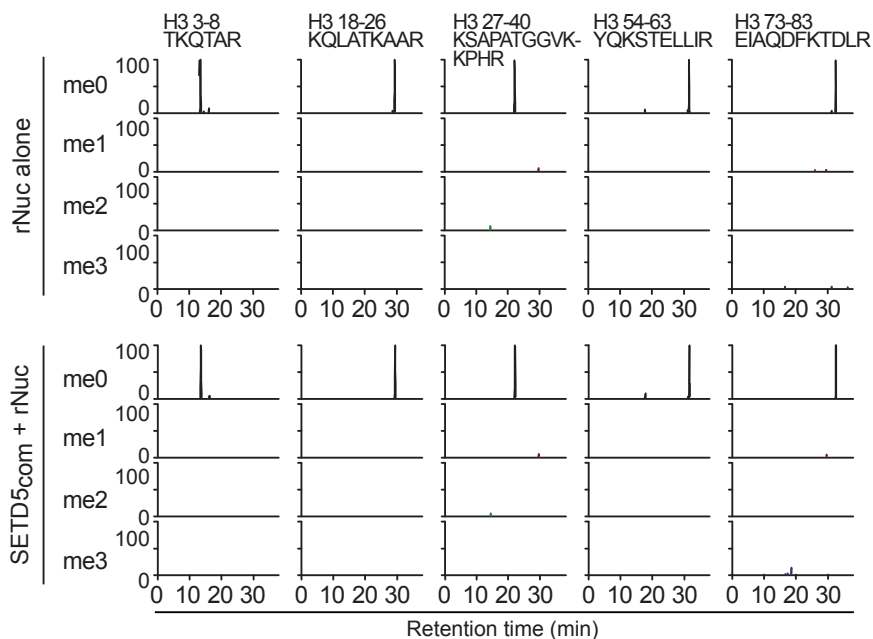**I**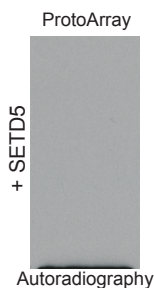**J**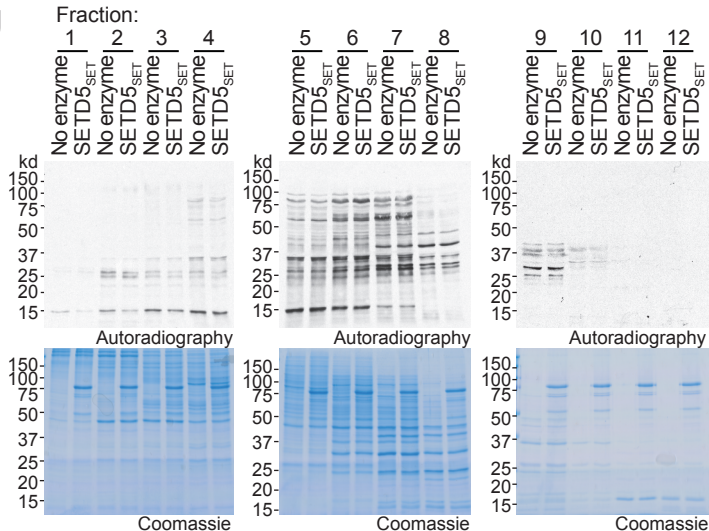

**Supplementary Figure 3. SETD5 lack intrinsic histone methyltransferase activity. Related to Figure 3.**

(A) Amino acid sequence alignment of the SET domain of human SETD5 with its most similar family member, the catalytically inert MLL5, and SETD2, NSD1, NSD2 and NSD3 – four validated H3K36 lysine methyltransferases. Boxed and asterisk denoted areas indicated conserved SAM binding sites found within all known active SET enzymes (and not conserved in SETD5 and MLL5).

(B) SETD5 does not methylate H3K36. Coomassie stain of human SETD5 (aa 1-415), murine SETD5 (aa 1-423) and SET domain of SETD2 (SETD2<sub>SET</sub>) purified from *E. coli* (left panel). These proteins were used for *in vitro* methylation reactions with poly-nucleosomes (rNuc<sub>poly</sub>, H3.3) as substrates as described in (Sessa et al., 2019). H3K36me1/2/3 were detected by western blots. Asterisk indicates cleaved H3 found in commercial poly-nucleosome.

(C-F) Full length SETD5 purified from insect cells has no histone methylation activity, in contrast to established KMTs. The purified SETD5 protein from insect cells (C) was used for *in vitro* methylation reactions with recombinant nucleosomes as substrates. Histone methylation states were detected by western blots with the indicated antibodies. SET domain of NSD2 (NSD2<sub>SET</sub>) (D) and MLL4 complex (MLL4<sub>com</sub>) (E) were purified from *E. coli*, PRC2 complex (F) were purified from insect cells.

(G) Representative tandem mass spectra identifying non- (K<sup>me0</sup>), mono- (K<sup>me1</sup>), di- (K<sup>me2</sup>), tri-methylation (K<sup>me3</sup>) of H3K9 methylated by SETD5<sub>com</sub> *in vitro* using S-adenosyl-methionine (SAM) as methyl donor and digested with trypsin (as in Figure 3E). *m/z* for b and y ions observed in spectra were indicated in blue and red, respectively.

(H) SETD5 complex has no activity on other histone H3 lysines including no activity on H3K36. Samples (as in F) were analyzed by selected ion chromatograms for non-, mono-, di- and tri-methyl histone H3 peptides. HPLC elution profiles show a 10 ppm mass window around expected peptide masses, peptide sequences flanking potential lysine methylation sites are provided for each panel.

(I) SETD5 does not methylate any protein on a ProtoArray. Representative image (n = 2 independent experiments) showing a SETD5 *in vitro* methylation reaction on protein arrays (ProtoArray - containing more than 9,000 potential substrates) using <sup>3</sup>H-SAM as methyl donor. Full length SETD5 was purified from insect cells.

(J) SETD5 does not show any methylation on proteins in nuclear extracts. *In vitro* methylation reactions on nuclear extracts of Panc1 cells separated by size-exclusion chromatography as substrates. SETD5<sub>SET</sub> (aa 1-520) purified from *E. coli*. was used as enzyme, <sup>3</sup>H-SAM as methyl donor. The appearance of a band specific to SETD5<sub>SET</sub> but not present in the no enzyme control would indicate a potential substrate but such a band is not seen.

**A**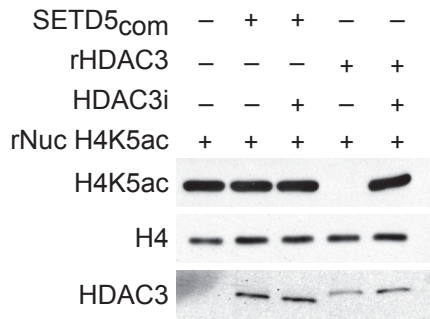**D**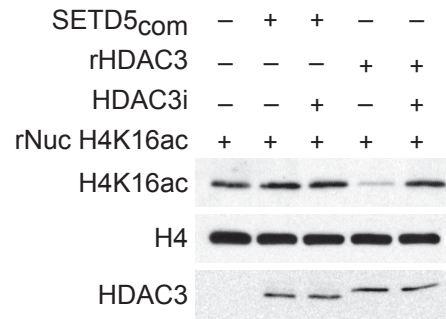**G**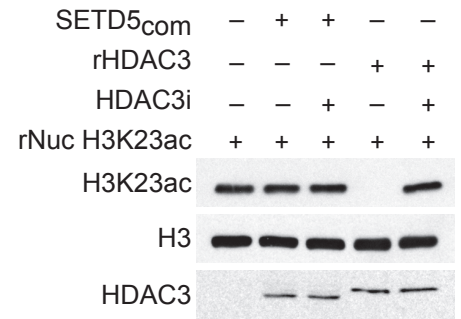**B**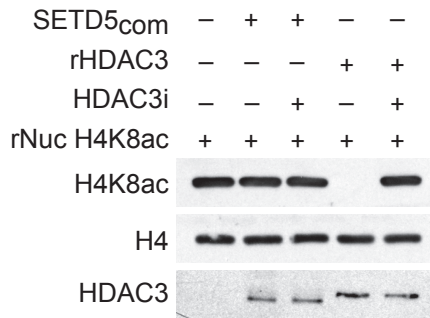**E**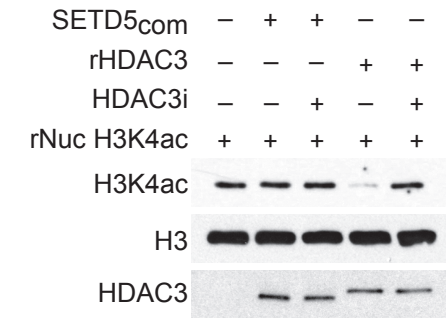**H**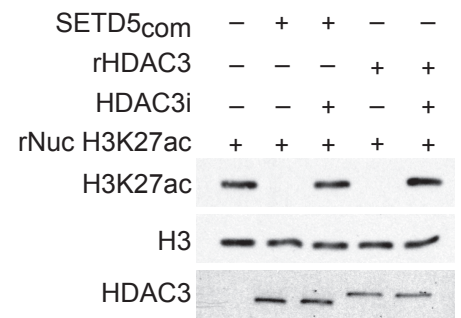**C**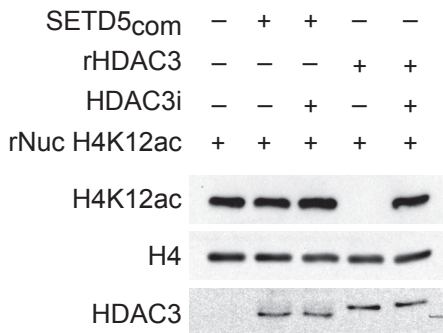**F**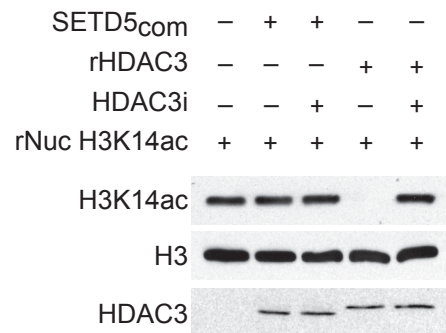**I**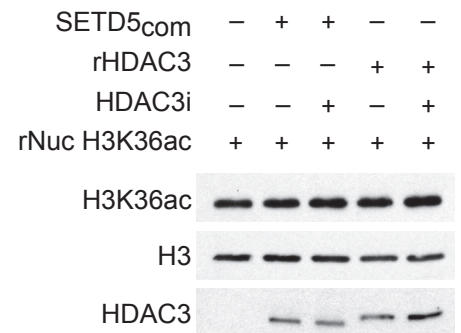



**Supplementary Figure 4. HDAC3 is converted into a highly selective deacetylase in the context of SETD5<sub>com</sub>. Related to Figure 5.**

(A-I) Screening of histone deacetylation activity of rHDAC3 complex or SETD5<sub>com</sub> on a library of recombinant nucleosomes designed to harbor a single acetylation modification at specific sites as substrates. Histone acetylation states were detected by western blots with the indicated antibodies: H4K5ac (A), H4K8ac (B), H4K12ac (C), H4K16ac (D), H3K4ac (E), H3K14ac (F), H3K23ac (G), H3K27ac (H) and H3K36a (I). See also [Figure 5G-H](#).

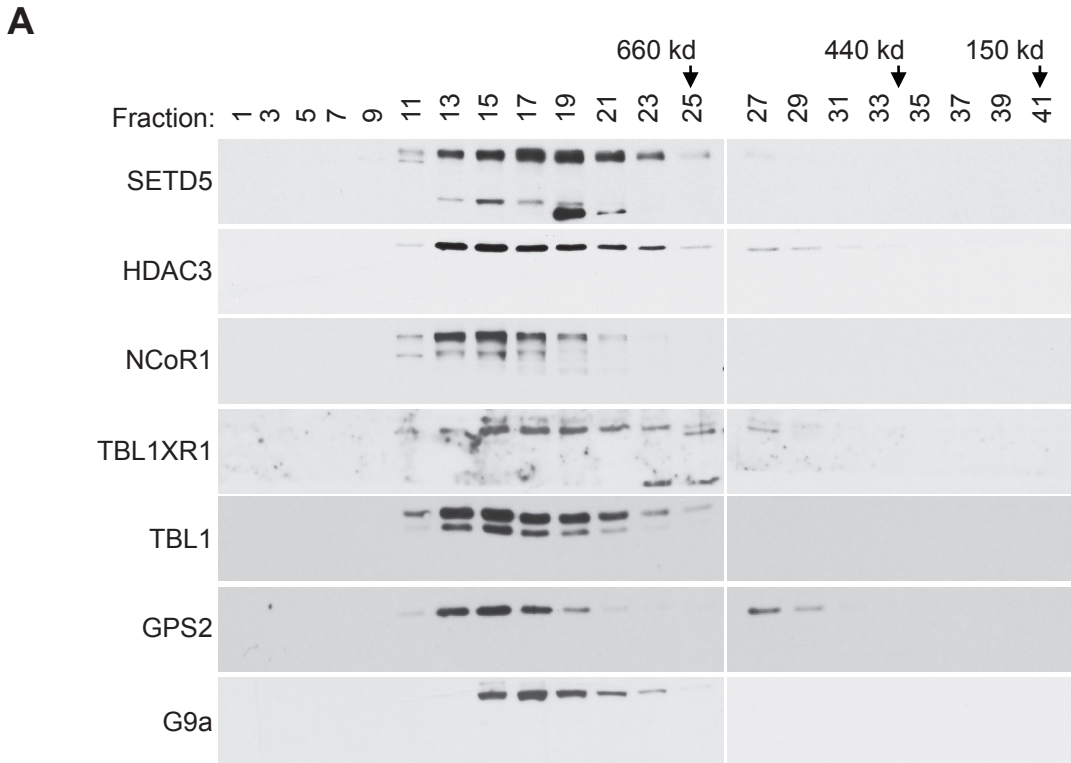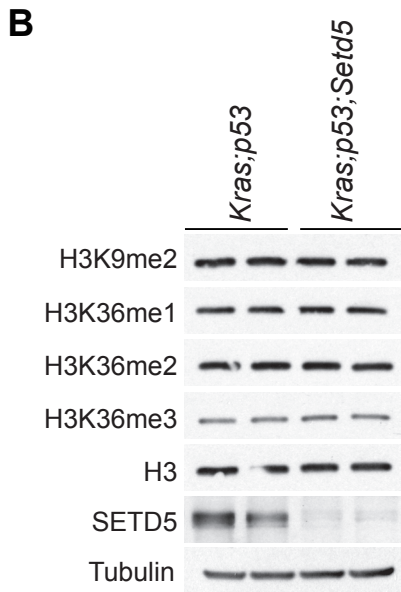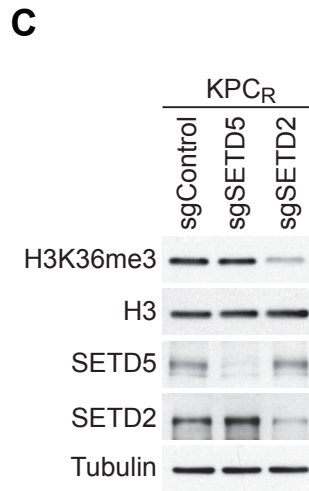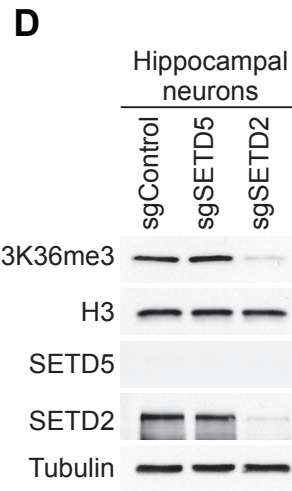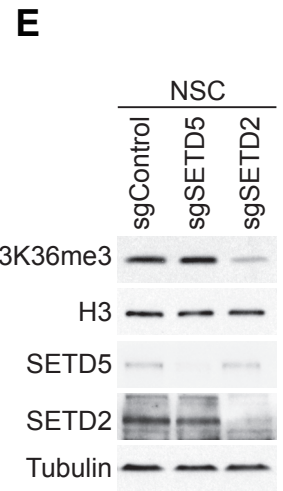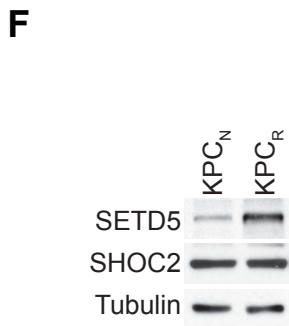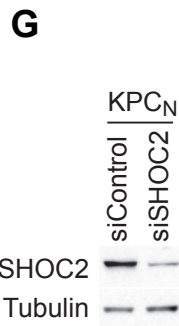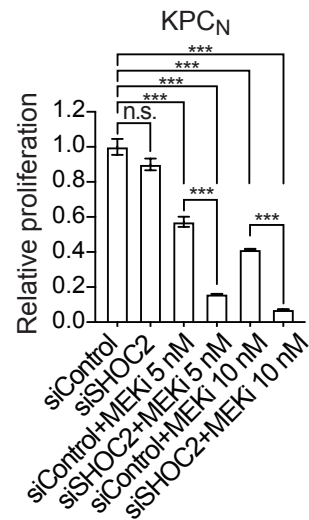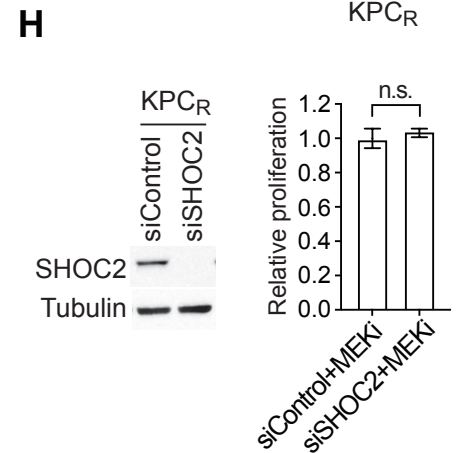

**Supplementary Figure 5. SETD5 forms a complex with HDAC3 and G9a in KPC<sub>R</sub> cells and SETD5 does not physiologically regulate H3K36 methylation. Related to Figure 3 and Figure 6.**

(A) Western analysis with the indicated antibodies of SETD5<sub>com</sub> isolated from KPC<sub>R</sub> cell nuclear extracts and separated on a Superose 6 HR gel filtration column. The fraction numbers are indicated and protein molecular mass standards relative to fractions are indicated by arrows.

(B) Western analysis with the indicated antibodies of whole cell lysates of PDAC cells isolated from *Kras;p53* (control) and *Kras;p53;Setd5* mutant mice (see also Figure S2). Two independent and representative samples are shown for each genotype. Note that there is no change in H3K36me3 levels.

(C-E) Western analysis with the indicated antibodies of whole cell lysates of KPC<sub>R</sub> mouse PDAC cells (C), embryonic hippocampal neurons (D) or neuron stem cells (NSC) (E) depleted using CRISPR-Cas9/sgRNA for SETD5 (sgSETD5), SETD2 (sgSETD2) or control (sgControl). SETD2, a known H3K36me3 methyltransferase serves as positive control of H3K36me3 methylation. A representative sample for each condition is shown. Note that SETD5 depletion has no impact on H3K36 methylation. NSCs were used in Figure 8E in (Sessa et al., 2019).

(F) Western analysis with the indicated antibodies of WCEs from KPC<sub>N</sub> and KPC<sub>R</sub> cells shows increased levels of SETD5 but not SHOC2 proteins in MEKi-resistant PDAC cells.

(G and H) SHOC2 depletion sensitizes KPC<sub>N</sub> cells, but not KPC<sub>R</sub> cells, to MEK inhibition. (G) KPC<sub>N</sub> cells treated as indicated with trametinib and (H) KPC<sub>R</sub> cells cultured in the presence of 0.2 μM trametinib were transfected with the indicated siRNA pools (siControl and siSHOC2). 48 hours later, a portion of cells was harvested for Western analysis (left panel) and for proliferation assay (right panel), which is shown as relative fold change over siControl. Error bars represent mean ± SD from three independent experiments. \*\*\*p < 0.001, n.s., not significant, two-tailed unpaired Student's t test.

**A**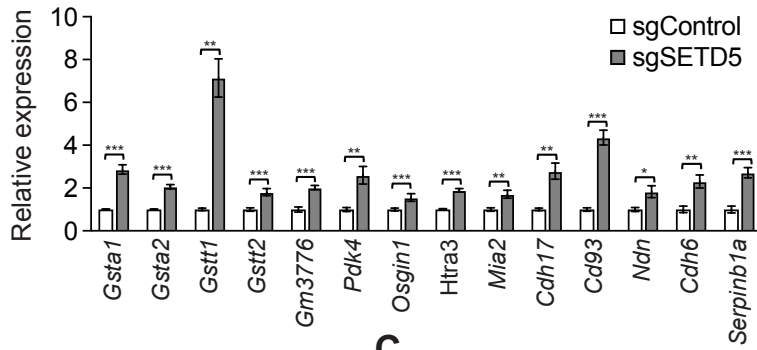**B**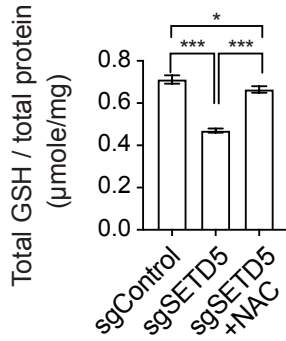**C**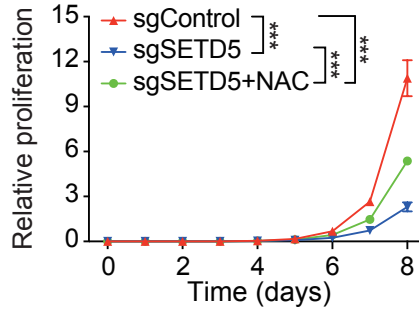**D**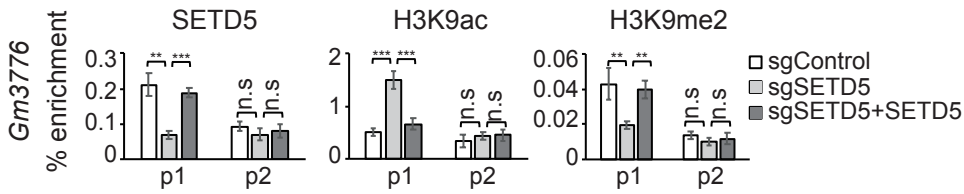**E**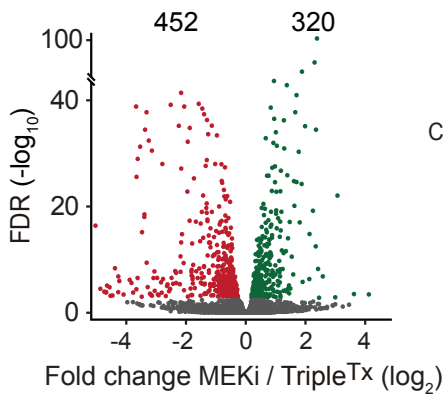**F**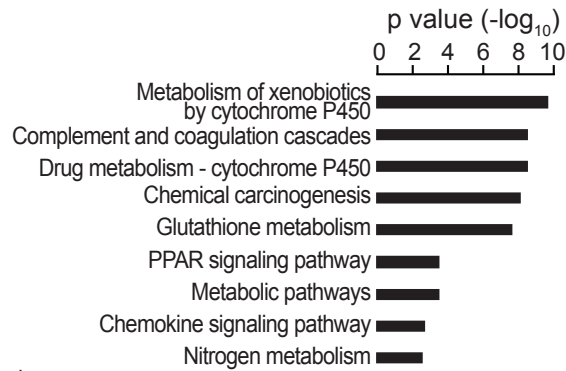**H**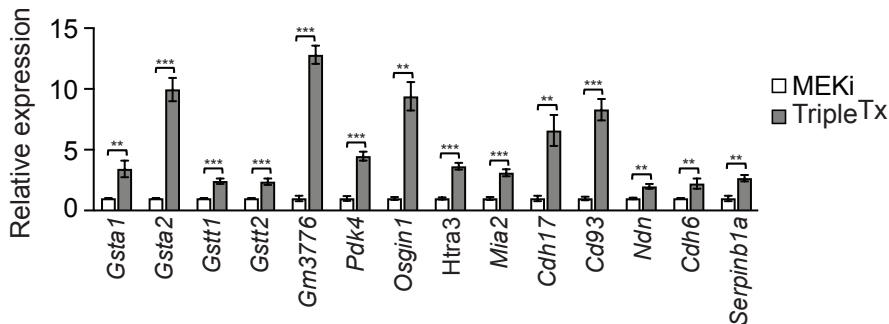**G**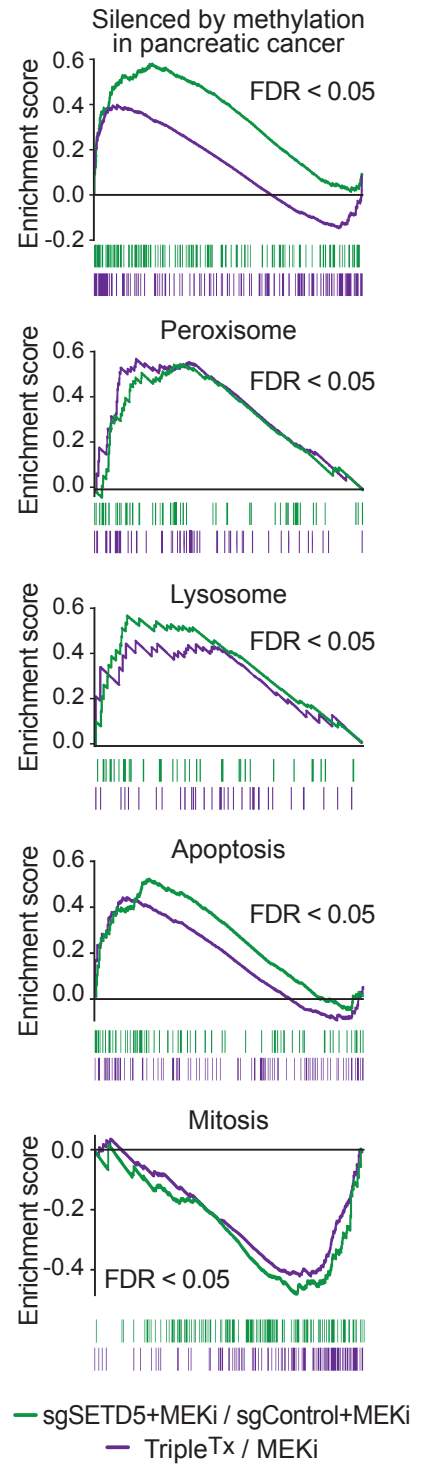**I**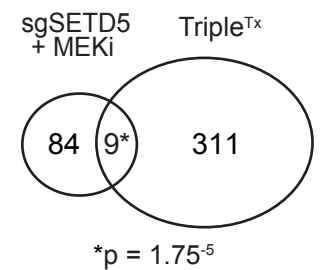

**Supplementary Figure 6. Small molecule inhibitors of G9a and HDAC3 phenocopy SETD5 loss. Related to Figure 6 and Figure 7.**

(A) Quantitative real-time PCR analysis of expression of SETD5 regulated genes in SETD5-deficient (sgSETD5) versus control (sgControl) KPC<sub>R</sub> cells. The real-time qPCR data were normalized to *Actb* and presented as fold changes of gene expression. Error bars represent mean  $\pm$  SD from three independent experiments. \* $p < 0.05$ , \*\* $p < 0.01$ , \*\*\* $p < 0.001$ , n.s., not significant, by two-tailed unpaired Student's t-test.

(B) N-acetyl-L-Cysteine (NAC) partially restores the levels of GSH in SETD5-depleted KPC<sub>R</sub> cells to levels observed in control KPC<sub>R</sub> cells. SETD5-depleted KPC<sub>R</sub> cells were treated with 1 mM NAC and GSH levels were determined as described in Figure 6H. Error bars represent mean  $\pm$  SD from three independent experiments. \*\*\* $p < 0.001$ , two-tailed unpaired Student's t test.

(C) NAC treatment partially rescues proliferation of SETD5-depleted KPC<sub>R</sub> cells to the proliferation rate of control KPC<sub>R</sub> cells. Error bars represent mean  $\pm$  SD from three independent experiments. \*\*\* $p < 0.001$ , n.s., not significant, two-tailed unpaired Student's t test.

(D) ChIP-qPCR analysis of SETD5, H3K9ac and H3K9me2 at the *GM3776* (Glutathione S-transferase) gene regulatory regions (*p1* and *p2*) in control (sgControl), SETD5-deficient (sgSETD5) or complemented with CRISPR-resistant wild-type SETD5 (sgSETD5 + SETD5) KPC<sub>R</sub> cells. The data are plotted as percent enrichment relative to input. Error bars represent mean  $\pm$  SEM from three independent experiments. \*\* $p < 0.01$ , \*\*\* $p < 0.001$ , n.s., not significant, by two-tailed unpaired Student's t-test.

(E) Volcano plot representing DEGs (differentially expressed genes) in RNA-seq data comparison between control (MEKi treated) and Triple<sup>Tx</sup> treated KPC<sub>R</sub> cells (three biological replicates for each condition). Detailed cell treatment condition description in [STAR Methods](#). The red dots represent 452 upregulated DEGs caused by Triple<sup>Tx</sup> (fold change  $\log_2 \leq -0.5$ ,  $p < 0.05$  by Wald test), green dots represent 320 downregulated DEGs caused by Triple<sup>Tx</sup> (fold change  $\log_2 \geq 0.5$ ,  $p < 0.05$  by Wald test), and grey dots represent non-DEGs. False discovery rate (FDR) values are provided (detailed description in [STAR Methods](#)).

(F) The most significantly enriched KEGG terms associated with the genes upregulated (452 genes) by Triple<sup>Tx</sup> treated in KPC<sub>R</sub> cancer cells.

(G) GSEA analysis of RNA-seq data of MEKi treated SETD5 ablated (sgSETD5+MEKi) versus control (sgControl+MEKi) and Triple<sup>Tx</sup> treated versus control (MEKi) KPC<sub>R</sub> cells. FDR values are provided (detailed description in [STAR Methods](#)).

(H) Quantitative real-time PCR analysis of expression of SETD5 regulated genes in Triple<sup>Tx</sup> versus control (MEKi) KPC<sub>R</sub> cancer cell line. The real-time qPCR data were normalized to *Actb* and presented as fold changes of gene expression. Error bars represent mean  $\pm$  SD from three independent experiments. \*\* $p < 0.01$ , \*\*\* $p < 0.001$ , n.s., not significant, by two-tailed unpaired Student's t-test.

(I) Venn diagram showing the overlap between downregulated genes in SETD5 depletion and Triple<sup>Tx</sup> therapy in MEKi resistant KPC<sub>R</sub> cancer cells. p value by hypergeometric test.

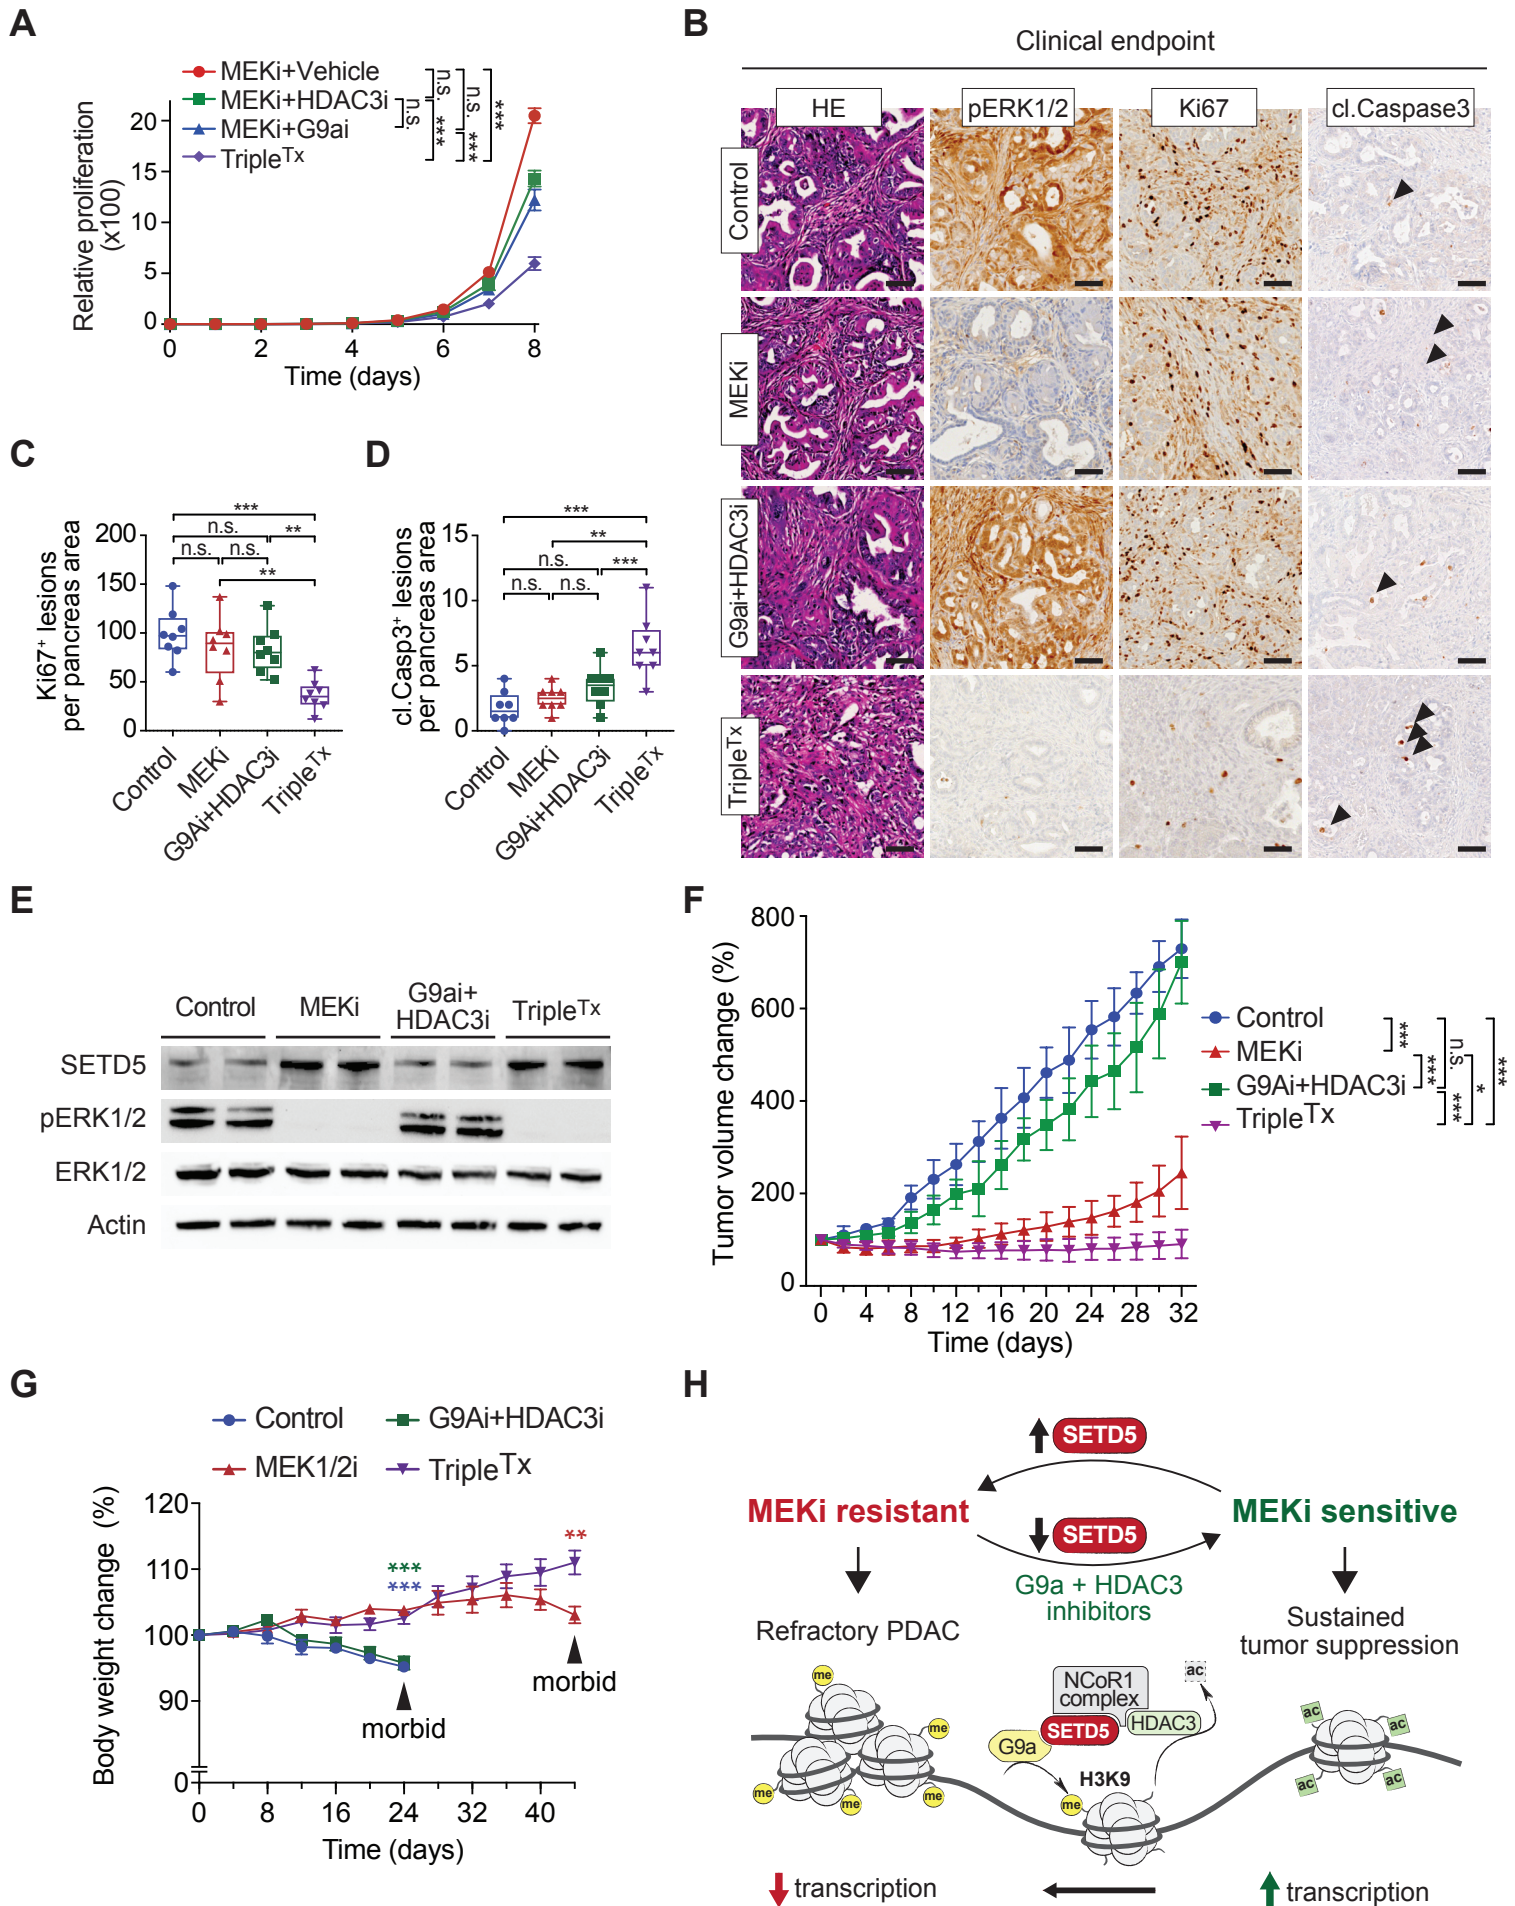

**Supplementary Figure 7. Combined inhibition of MEK and the histone-modifying activities associated with SETD5 leads to sustained suppression of PDAC growth in PDXs and mouse models. Related to Figure 7.**

(A) Proliferation for eight days of KPC<sub>R</sub> cells treated with MEKi, MEKi + G9ai, MEKi + HDAC3i or Triple<sup>Tx</sup>. Error bars represent SD from three independent experiments. \*\*\*p < 0.001, by two-tailed unpaired Student's t-test.

(B) Representative HE and immunohistochemistry staining for phospho ERK1/2 (pERK1/2) a marker of MEK1/2 inhibition, Ki67, a marker of proliferation, cleaved Caspase 3 (cl. Caspase3) a marker of apoptosis (arrowheads), in control and G9ai + HDAC3i, MEKi and combination treated (Triple<sup>Tx</sup>) *Kras;p53* mutant mouse model of PDAC. Scale bars, 50 μm

(C and D) Quantification of proliferation (Ki67 positive cells) (C) and cleaved Caspase 3 (cl. Caspase3) (D) a marker of apoptosis in *Kras;p53* mutant mice treated with MEKi, G9ai + HDACi or combination (Triple<sup>Tx</sup>), (n = 8 for each experimental group). Boxes: 25<sup>th</sup> to 75<sup>th</sup> percentile, whiskers: min. to max., center: median; arrowheads, positive cleaved Caspase 3 cells; \*p < 0.033, \*\*p < 0.002; \*\*\*p < 0.0001 by two-way ANOVA with Tukey's testing for multiple comparisons.

(E) Western analysis with indicated antibodies of tumor biopsies from *Kras;p53* mutant mice treated with MEKi, G9ai+HDACi, combination (Triple<sup>Tx</sup>) or vehicle (control). Each treatment group represents two biological replicates.

(F) Tumor volume quantification for patient derived PDAC xenografts treated with MEKi, G9ai+HDACi, Triple<sup>Tx</sup> or vehicle (control). (n = 8 mice for each treatment group). Data are represented as mean ± SEM. \*p < 0.033, \*\*p < 0.002; \*\*\*p < 0.0001 by two-way ANOVA with Tukey's testing for multiple comparisons.

(G) *Kras;p53* mutant mice weight changes in the course of treatment (n = 8, for each experimental condition). Note that control animals lose weight as a consequence of increased tumor burden (cachectic state); arrowheads indicate the last measurements that could be performed on animals in the indicated treatment arm. \*\*p < 0.01; \*\*\*p < 0.001; by two-tailed unpaired Student's t-test.

(H) Model of the role SETD5 plays at coordinating histone-modifying activities to regulate a gene expression program that mediates adaptive resistance to MEKi therapy.

**Table S2. Identification of SETD5 interactions by mass spectrometry. Related to Figure 3.**

V5-SETD5-Flag with PreScission Protease cutting site between V5 and SETD5 was tandem-affinity purified (TAP) from 293T cells with V5 and Flag antibody affinity beads. After elution from beads, material was separated by 10% SDS polyacrylamide gel electrophoresis (SDS-PAGE) and silver stained. Proteins in gel slice of ~170 kd were excised, digested with trypsin and analyzed by mass spectrometry. Contaminant signals were removed and only proteins with 2 or more peptides detected are shown.

| Protein IDs                                    | Peptides detected | Sequence length |
|------------------------------------------------|-------------------|-----------------|
| <b>SET domain-containing protein 5</b>         | <b>12</b>         | <b>1442</b>     |
| <b>Histone-lysine N-methyltransferase G9a</b>  | <b>7</b>          | <b>1210</b>     |
| Alpha-enolase                                  | 3                 | 434             |
| Histone H2A type1-J                            | 3                 | 128             |
| Heterogeneous nuclear ribonucleoproteins A2/B1 | 2                 | 353             |
| Histone H2B type F-S                           | 2                 | 126             |
| Moesin                                         | 2                 | 577             |
| Plastin-2                                      | 2                 | 627             |
